# Supplementary material for: Coarse-resolution Ecology of Etiological Agent, Vector, and Reservoirs of Zoonotic Cutaneous Leishmaniasis in Libya
Source: PLOS journal article supplement (doi:10.1371/journal.pntd.0004381), 2016-02-10

**S4 File: Visualizations of ecological niches of four potential mammal reservoirs in two environmental dimensions.** The diagram shows the overall environment available across Libya (gray), and the suitable conditions for species occurrences (pink).

***Meriones libycus***

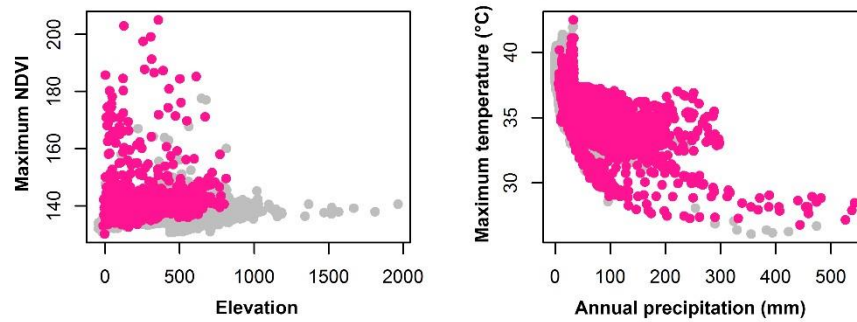

***Meriones shawi***

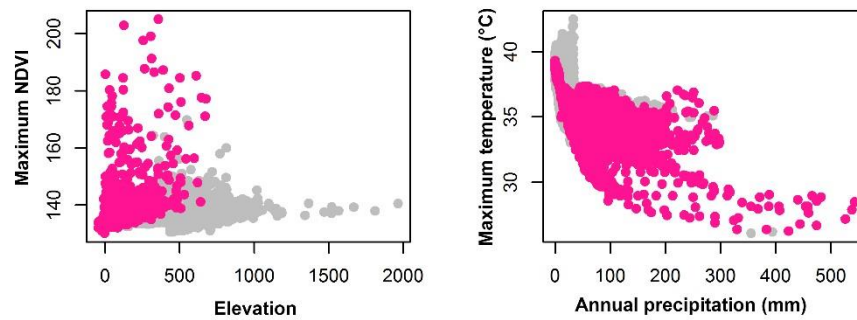

***Psammomys obesus***

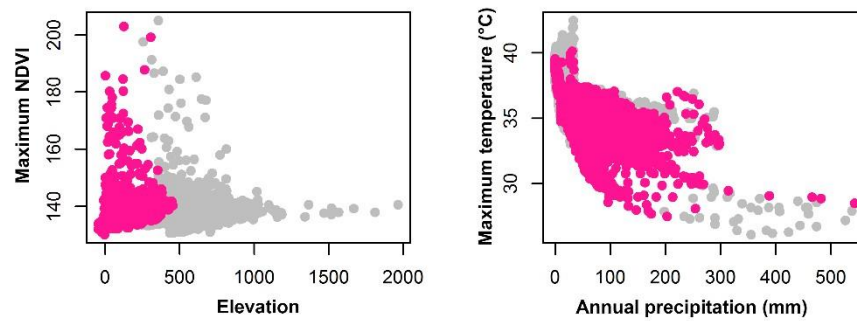

***Gerbillus gerbillus***

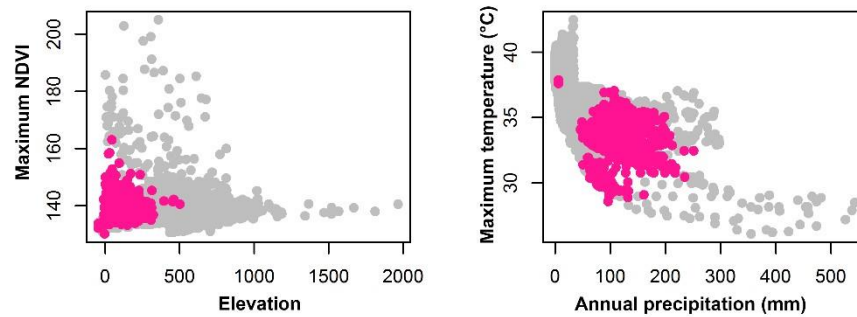

Supplement: S4 (10.1371/journal.pntd.0004381.s004) [file journal.pntd.0004381.s004]
